# Supplementary material for: Do Additional Clinical Risk Factors Improve the Performance of Fracture Risk Assessment Tool (FRAX) Among Postmenopausal Women? Findings From the Women's Health Initiative Observational Study and Clinical Trials
Source: PubMed Central journal article supplement (PMC6894725; doi:10.1002/jbm4.10239), 2019-11-30
Supplement: JBM4-3-na-s001.pdf [file JBM4-3-na-s001.pdf]

## Supplemental Tables

Do additional clinical risk factors improve the performance of Fracture Risk Assessment Tool (FRAX) Among Postmenopausal Women? Findings from the Women's Health Initiative Observational Study and Clinical Trials

Carolyn J. Crandall, MD, MS, Joseph Larson, MS, Jane A. Cauley, DrPH, John T. Schousboe, MD, PhD, Andrea Z. LaCroix, PhD, John A. Robbins, MD, Nelson B. Watts, MD, Kristine E. Ensrud, MD, MPH

| <b>Table</b>                                                                                                                                                                                                                                                          | <b>Page #</b> |
|-----------------------------------------------------------------------------------------------------------------------------------------------------------------------------------------------------------------------------------------------------------------------|---------------|
| Supplemental Table 1. Risk Reclassification Table of 10-Year Major Osteoporotic Fracture and Hip Fracture, Stratified by Individual Variables Included in the Model                                                                                                   | 2             |
| Supplemental Table 2. AUC values for Fracture Risk Assessment Tool (FRAX) alone and FRAX with additional clinical characteristics on 10-year major osteoporotic fracture, including participants with less than 10 years of follow-up (regardless of fracture status) | 3             |
| Supplemental Table 3. Area under the Receiver Operating Characteristic Curve Values for Fracture Risk Assessment Tool (FRAX) Alone and FRAX with Additional Clinical Characteristics on Predicted 10-year Risk of Fracture Among Women Not Taking Hormone Therapy     | 4             |
| Supplemental Table 4. Area under the Receiver Operating Characteristic Curve Values for Fracture Risk Assessment Tool (FRAX) Alone and FRAX with Additional Clinical Characteristics on Predicted 10-year Risk of Fracture Among Women Aged $\geq 65$ Years           | 5             |

**Supplemental Table 1. Risk Reclassification Table of 10-Year Major Osteoporotic Fracture and Hip Fracture, Stratified by Individual Variables Included in the Model\***

| <b>Outcome</b>                                    | <b>Variable added to model containing FRAX</b> | <b>Outcome Type</b> | <b>NRI<sup>1</sup></b> |
|---------------------------------------------------|------------------------------------------------|---------------------|------------------------|
| Hip Fracture<br>(High risk $\geq 3\%$ )           | Diabetes                                       | Case                | 0.04                   |
|                                                   |                                                | Non-Case            | -0.02                  |
|                                                   | Falls                                          | Case                | 0.02                   |
|                                                   |                                                | Non-Case            | -0.01                  |
|                                                   | Vasomotor Symptoms                             | Case                | 0.02                   |
|                                                   |                                                | Non-Case            | -0.01                  |
|                                                   | Physical Function                              | Case                | 0.11                   |
|                                                   |                                                | Non-Case            | -0.05                  |
|                                                   | All Additional Factors                         | Case                | 0.14                   |
|                                                   |                                                | Non-Case            | -0.06                  |
| Osteoporotic Fracture<br>(High risk $\geq 20\%$ ) | Diabetes                                       | Case                | 0.01                   |
|                                                   |                                                | Non-Case            | -0.00                  |
|                                                   | Falls                                          | Case                | 0.01                   |
|                                                   |                                                | Non-Case            | -0.00                  |
|                                                   | Vasomotor Symptoms                             | Case                | 0.00                   |
|                                                   |                                                | Non-Case            | -0.00                  |
|                                                   | Physical Function                              | Case                | 0.04                   |
|                                                   |                                                | Non-Case            | -0.01                  |
|                                                   | All Additional Factors                         | Case                | 0.06                   |
|                                                   |                                                | Non-Case            | -0.02                  |

\* For cases, NRI calculates and tests being reclassified into the high-risk category; For non-cases, NRI calculates and tests being reclassified into the low-risk category.

**Supplemental Table 2. AUC values for Fracture Risk Assessment Tool (FRAX) alone and FRAX with additional clinical characteristics on 10-year major osteoporotic fracture, including participants with less than 10 years of follow-up (regardless of fracture status)**

| <b>Model*</b>                            | <b>n</b> | <b>AUC (95% CI)</b> |
|------------------------------------------|----------|---------------------|
| <b>All Participants</b>                  |          |                     |
| Age                                      | 129439   | 61.9 (61.4, 62.4)   |
| Age + body mass index                    | 129439   | 62.0 (61.5, 62.5)   |
| Age + history of fracture (any site)     | 129439   | 62.7 (62.1, 63.2)   |
| <i>FRAX alone (all participants)</i>     | 129439   | 64.2 (63.6, 64.7)   |
| FRAX alone (white participants)          | 107906   | 62.2 (61.6, 62.7)   |
| FRAX alone (black participants)          | 10960    | 57.5 (54.3, 60.7)   |
| FRAX + treated diabetes                  | 129439   | 64.2 (63.7, 64.7)   |
| FRAX + $\geq 2$ falls in the past year   | 129439   | 64.5 (63.9, 65.0)   |
| FRAX + vasomotor symptoms                | 129439   | 64.0 (63.6, 64.6)   |
| FRAX + physical function                 | 129439   | 64.5 (63.9, 65.0)   |
| FRAX + all additional factors            | 129439   | 64.7 (64.2, 65.3)   |
| <b>BMD Subset</b>                        |          |                     |
| Age                                      | 8247     | 62.2 (60.1, 64.2)   |
| Age + body mass index                    | 8247     | 62.2 (60.2, 64.2)   |
| Age + history of fracture (any site)     | 8247     | 63.9 (61.9, 66.0)   |
| <i>FRAX alone (all participants)</i>     | 8247     | 69.2 (67.3, 71.1)   |
| FRAX alone (white participants)          | 6410     | 66.2 (64.1, 68.3)   |
| FRAX alone (black participants)          | 1222     | 65.2 (54.6, 75.9)   |
| FRAX + treated diabetes                  | 8247     | 69.3 (67.4, 71.2)   |
| FRAX + $\geq 2$ falls in the past year   | 8247     | 69.3 (67.3, 71.2)   |
| FRAX + vasomotor symptoms                | 8247     | 69.1 (67.2, 71.0)   |
| FRAX + physical function                 | 8247     | 69.2 (67.3, 71.2)   |
| FRAX + lumbar spine bone mineral density | 8247     | 69.1 (67.2, 71.0)   |
| FRAX + all additional factors            | 8247     | 69.5 (67.5, 71.4)   |

\* All models are adjusted for intervention assignment in the WHI Hormone (Active, Placebo, not Randomized) and Calcium Vitamin D (Active, Placebo, Not Randomized) trials. BMD: bone mineral density.

**Supplemental Table 3. Area under the Receiver Operating Characteristic Curve Values for Fracture Risk Assessment Tool (FRAX) Alone and FRAX with Additional Clinical Characteristics on Predicted 10-year Risk of Fracture Among Women Not Taking Hormone Therapy\***

| Model                                  | Hip Fracture |                          | Major Osteoporotic Fracture |                          |
|----------------------------------------|--------------|--------------------------|-----------------------------|--------------------------|
|                                        | n            | AUC (95% CI)             | n                           | AUC (95% CI)             |
| All Participants                       |              |                          |                             |                          |
| Age                                    | 45431        | 76.6 (75.2, 77.9)        | 46980                       | 64.1 (63.4, 64.8)        |
| Age + BMI                              | 45431        | 77.0 (75.7, 78.3)        | 46980                       | 64.2 (63.5, 64.9)        |
| Age + hx fracture (any site)           | 45431        | 76.6 (75.2, 77.9)        | 46980                       | 64.6 (63.9, 65.4)        |
| <i>FRAX alone (all participants)</i>   | <i>45431</i> | <i>76.6 (75.3, 77.9)</i> | <i>46980</i>                | <i>65.0 (64.3, 65.7)</i> |
| FRAX alone (white participants)        | 38551        | 75.4 (74.0, 76.8)        | 39897                       | 63.6 (62.9, 64.4)        |
| FRAX alone (black participants)        | 3969         | 79.9 (71.3, 88.5)        | 4044                        | 60.2 (56.3, 64.1)        |
| FRAX + treated diabetes                | 45431        | 76.2 (74.9, 77.5)        | 46980                       | 65.2 (64.5, 65.9)        |
| FRAX + $\geq 2$ falls in the past year | 45431        | 75.5 (74.1, 76.9)        | 46980                       | 65.3 (64.6, 66.0)        |
| FRAX + vasomotor symptoms              | 45431        | 74.7 (73.2, 76.2)        | 46980                       | 65.0 (64.3, 65.7)        |
| FRAX + physical function               | 45431        | 75.2 (73.8, 76.6)        | 46980                       | 66.0 (65.3, 66.7)        |
| FRAX + all additional factors          | 45431        | 75.2 (73.7, 76.6)        | 46980                       | 66.4 (65.7, 67.1)        |
| <b>BMD Subset</b>                      |              |                          |                             |                          |
| Age                                    | 2917         | 73.3 (68.2, 78.4)        | 3044                        | 65.8 (63.2, 68.4)        |
| Age + BMI                              | 2917         | 73.6 (68.4, 78.7)        | 3044                        | 65.7 (63.2, 68.3)        |
| Age + hx fracture (any site)           | 2917         | 73.4 (68.4, 78.4)        | 3044                        | 67.2 (64.6, 69.8)        |
| <i>FRAX alone (all participants)</i>   | <i>2917</i>  | <i>80.2 (75.9, 84.5)</i> | <i>3044</i>                 | <i>71.2 (68.8, 73.7)</i> |
| FRAX alone (white participants)        | 2331         | 77.9 (73.2, 82.7)        | 2440                        | 68.4 (65.6, 71.1)        |
| FRAX alone (black participants)        | 407          | 79.9 (61.1, 98.7)        | 413                         | 69.4 (56.1, 82.6)        |
| FRAX + treated diabetes                | 2917         | 80.0 (75.6, 84.4)        | 3044                        | 71.4 (68.9, 73.8)        |
| FRAX + $\geq 2$ falls in the past year | 2917         | 78.7 (74.2, 83.3)        | 3044                        | 71.6 (69.1, 74.0)        |
| FRAX + vasomotor symptoms              | 2917         | 80.0 (75.0, 84.1)        | 3044                        | 71.3 (68.9, 73.8)        |
| FRAX + physical function               | 2917         | 78.7 (74.3, 83.0)        | 3044                        | 72.6 (70.2, 75.0)        |
| FRAX + lumbar spine BMD                | 2917         | 78.5 (74.0, 83.0)        | 3044                        | 71.0 (68.6, 73.5)        |
| FRAX + all additional factors          | 2917         | 80.0 (75.6, 84.4)        | 3044                        | 73.2 (70.8, 75.6)        |

\* BMD: Bone mineral density

**Supplemental Table 4. Area under the Receiver Operating Characteristic Curve Values for Fracture Risk Assessment Tool (FRAX) Alone and FRAX with Additional Clinical Characteristics on Predicted 10-year Risk of Fracture Among Women Aged  $\geq 65$  Years**

| Model <sup>1</sup>                     | Hip Fracture |                          | Osteoporotic Fracture |                          |
|----------------------------------------|--------------|--------------------------|-----------------------|--------------------------|
|                                        | n            | AUC (95% CI)             | n                     | AUC (95% CI)             |
| <b>All Participants</b>                |              |                          |                       |                          |
| Age                                    | 38227        | 69.4 (68.1, 70.8)        | 39771                 | 60.3 (59.6, 61.0)        |
| Age + BMI                              | 38227        | 70.0 (68.6, 71.3)        | 39771                 | 60.3 (59.6, 61.0)        |
| Age + hx fracture (any site)           | 38227        | 69.6 (68.2, 71.0)        | 39771                 | 61.3 (60.6, 62.1)        |
| <i>FRAX alone (all participants)</i>   | <i>38227</i> | <i>69.0 (67.7, 70.4)</i> | <i>39771</i>          | <i>61.3 (60.6, 62.0)</i> |
| FRAX alone (white participants)        | 34375        | 68.5 (67.1, 69.9)        | 35765                 | 60.5 (60.0, 61.3)        |
| FRAX alone (black participants)        | 1860         | 77.2 (69.9, 84.5)        | 1906                  | 62.5 (58.0, 67.1)        |
| FRAX + treated diabetes                | 38227        | 69.7 (68.3, 71.0)        | 39771                 | 61.7 (61.0, 62.5)        |
| FRAX + $\geq 2$ falls in the past year | 38227        | 68.7 (67.3, 70.0)        | 39771                 | 61.9 (61.2, 62.6)        |
| FRAX + vasomotor symptoms              | 38227        | 68.7 (67.3, 70.0)        | 39771                 | 61.3 (60.6, 62.0)        |
| FRAX + physical function               | 38227        | 69.5 (68.2, 70.9)        | 39771                 | 62.9 (62.2, 63.7)        |
| FRAX + all additional factors          | 38227        | 70.0 (68.7, 71.4)        | 39771                 | 63.5 (62.8, 64.2)        |
| <b>BMD Subset</b>                      |              |                          |                       |                          |
| Age                                    | 2363         | 67.7 (62.5, 73.0)        | 2498                  | 61.8 (59.0, 64.6)        |
| Age + BMI                              | 2363         | 68.3 (63.1, 73.5)        | 2498                  | 61.8 (59.0, 64.7)        |
| Age + hx fracture (any site)           | 2363         | 67.7 (62.4, 72.9)        | 2498                  | 63.7 (60.9, 66.5)        |
| <i>FRAX alone (all participants)</i>   | <i>2363</i>  | <i>72.0 (67.0, 77.0)</i> | <i>2498</i>           | <i>67.7 (65.1, 70.3)</i> |
| FRAX alone (white participants)        | 2067         | 71.7 (66.5, 76.9)        | 2190                  | 66.4 (63.7, 69.2)        |
| FRAX alone (black participants)        | 198          | 81.2 (75.8, 86.7)        | 202                   | 75.0 (62.4, 87.6)        |
| FRAX + treated diabetes                | 2363         | 73.1 (68.2, 78.1)        | 2498                  | 67.9 (65.3, 70.5)        |
| FRAX + $\geq 2$ falls in the past year | 2363         | 73.1 (68.1, 78.0)        | 2498                  | 68.1 (65.5, 70.7)        |
| FRAX + vasomotor symptoms              | 2363         | 71.8 (66.8, 76.8)        | 2498                  | 67.7 (65.1, 70.3)        |
| FRAX + physical function               | 2363         | 72.0 (67.0, 77.0)        | 2498                  | 69.2 (66.6, 71.8)        |
| FRAX + lumbar spine BMD                | 2363         | 71.7 (66.7, 76.6)        | 2498                  | 67.4 (64.8, 70.0)        |
| FRAX + all additional factors          | 2363         | 75.3 (70.6, 80.1)        | 2498                  | 70.0 (67.4, 72.6)        |
